# Supplementary material for: Nocturnal aerosol optical depth measurements with modified sky radiometer POM-02 using the moon as a light source
Source: Copernicus journal article supplement (doi:10.5194/amt-12-6465-2019), 2019-12-09
Supplement: Supplementary file 1 [file amt-12-6465-2019-supplement.pdf]

Supplement of Atmos. Meas. Tech., 12, 6465–6488, 2019  
<https://doi.org/10.5194/amt-12-6465-2019-supplement>  
© Author(s) 2019. This work is distributed under  
the Creative Commons Attribution 4.0 License.

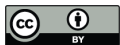

*Supplement of*

## **Nocturnal aerosol optical depth measurements with modified sky radiometer POM-02 using the moon as a light source**

**Akihiro Uchiyama et al.**

*Correspondence to:* Uchiyama Akihiro ([uchiyama.akihiro@nies.go.jp](mailto:uchiyama.akihiro@nies.go.jp))

The copyright of individual parts of the supplement might differ from the CC BY 4.0 License.

## Supplement

The time series of the AOD at 500 nm and PWV at Tsukuba for 5 months are shown in Fig. S1 and Fig. S2, respectively. These are non-cloud screened data.

In addition, the time series of the comparison between HSRL and POM-02 AOD and the time series of the comparison between GPS and POM-02 PWV are shown in Fig. S3 and Fig. S4.

### Figure captions

Fig. S1 Time series of the AOD at 500 nm at Tsukuba for 5 months. (a) January, (b) February, (c) March, (d) April, (e) May.

Fig. S2 Time series of the PWV at Tsukuba for 5 months. (a) January, (b) February, (c) March, (d) April, (e) May.

Fig. S3 Time series of the comparison between HSRL and POM-02 AOD for 5 months. Red symbols are HSRL AOD, blue symbols are AOD in the nighttime, and green symbols are AOD in the daytime. The data are 15-minute averages.

Fig. S4 Time series of the comparison between GPS and POM-02 PWV for 5 months. Red symbols are GPS PWV, blue symbols are PWV in the nighttime, and green symbols are PWV in the daytime. The data are 30-minute averages.

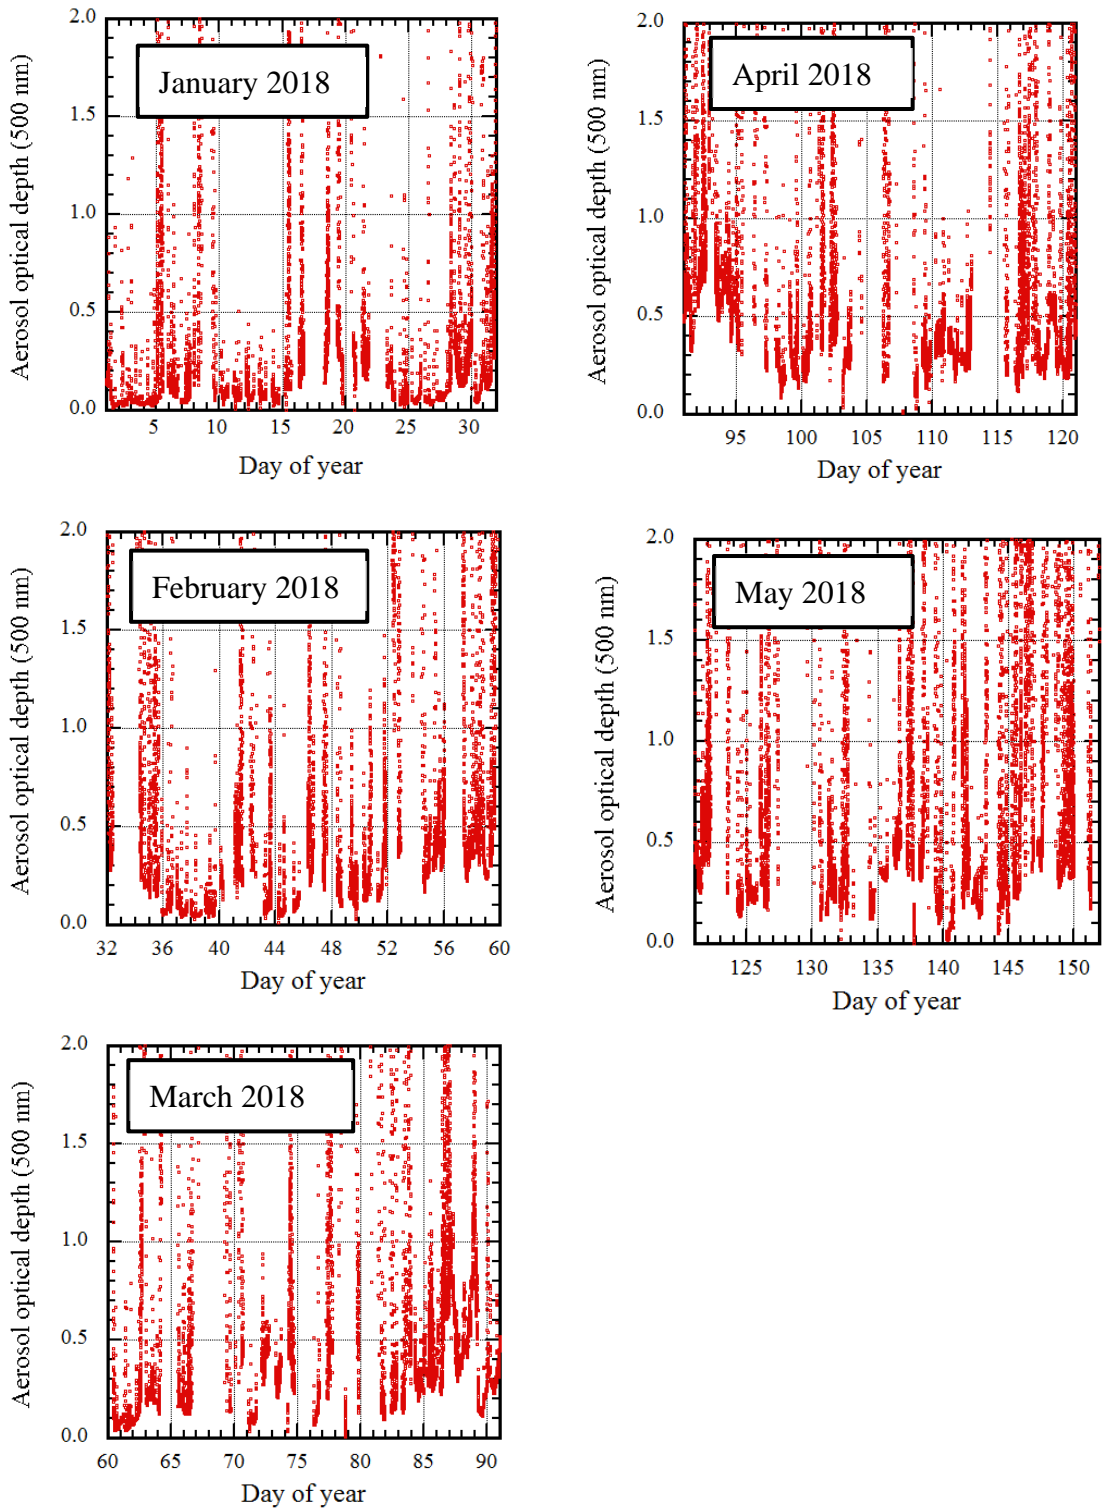

Fig. S1 Time series of the AOD at 500 nm at Tsukuba for 5 months.  
(a) January, (b) February, (c) March, (d) April, (e) May.

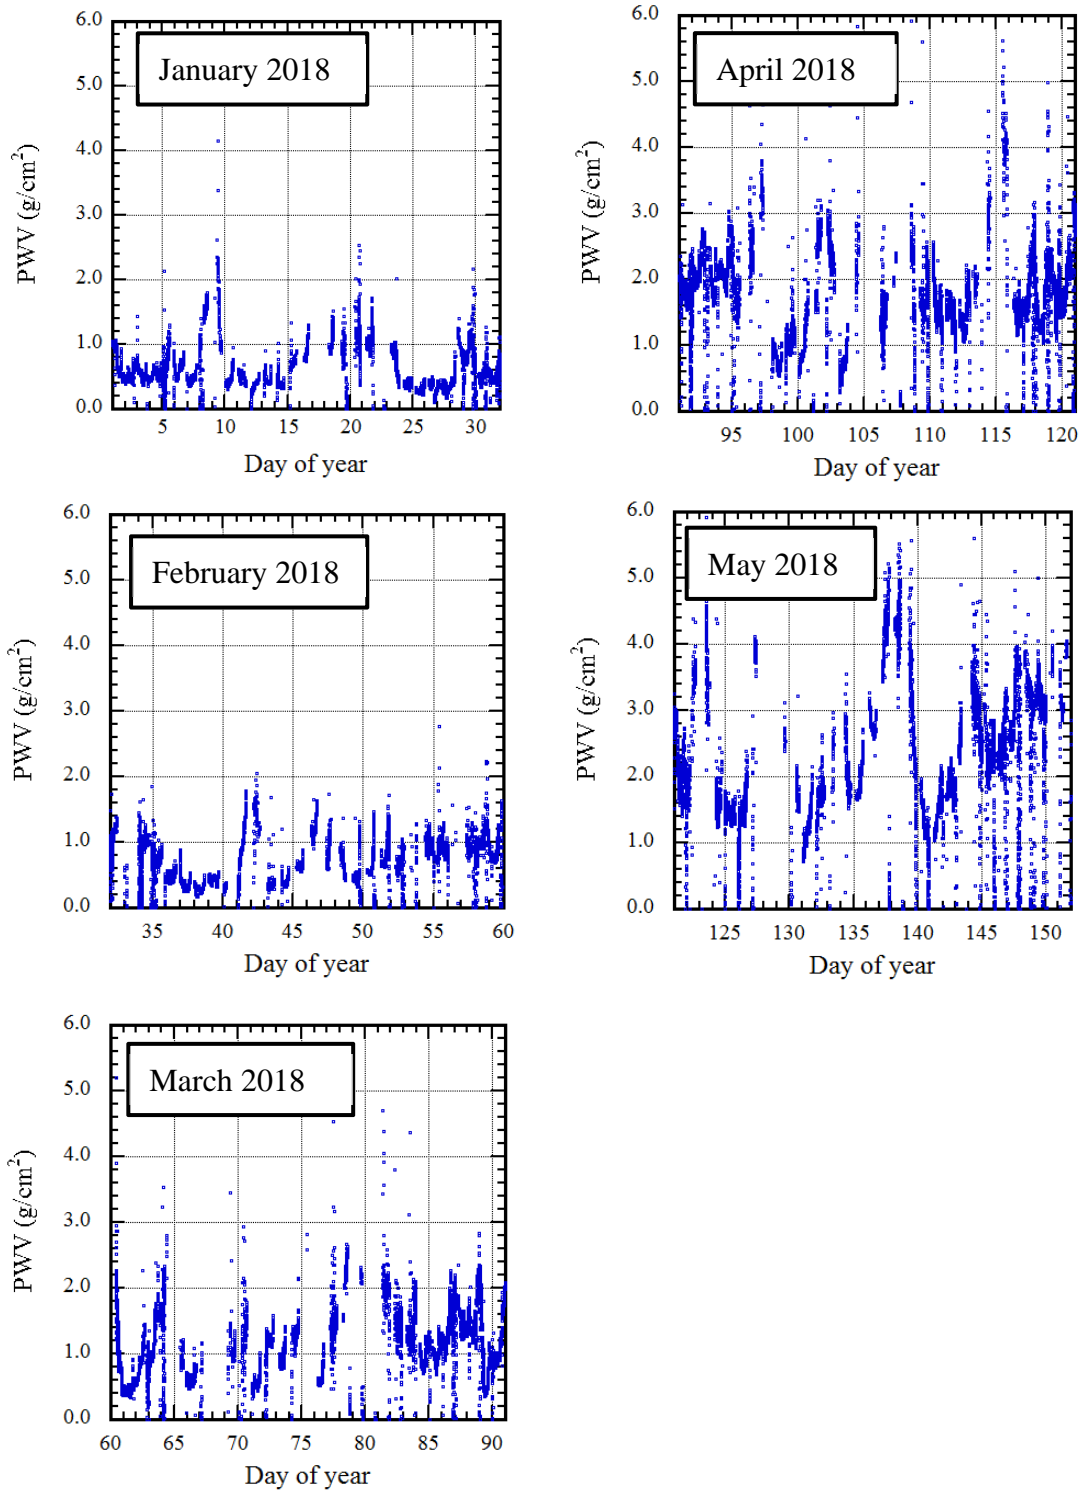

Fig. S2 Time series of the PWV at Tsukuba for 5 months.  
 (a) January, (b) February, (c) March, (d) April, (e) May.

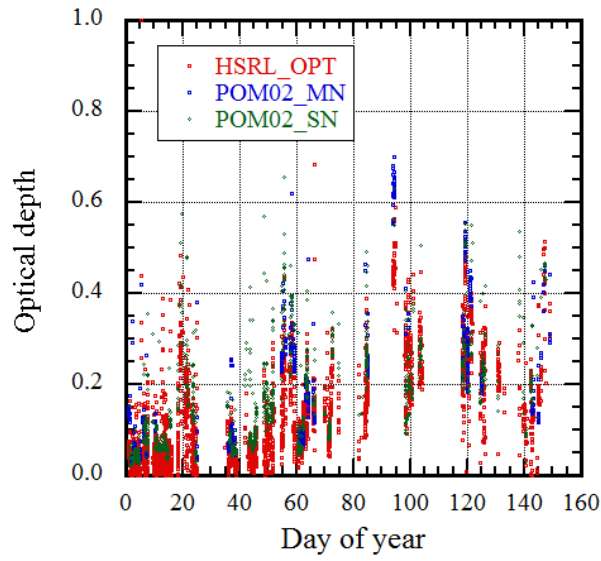

Fig. S3 Time series of the comparison between HSRL and POM-02 AOD. Red symbols are HSRL AOD, blue symbols are AOD in the nighttime, and green symbols are AOD in the daytime. The data are 15-minute averages.

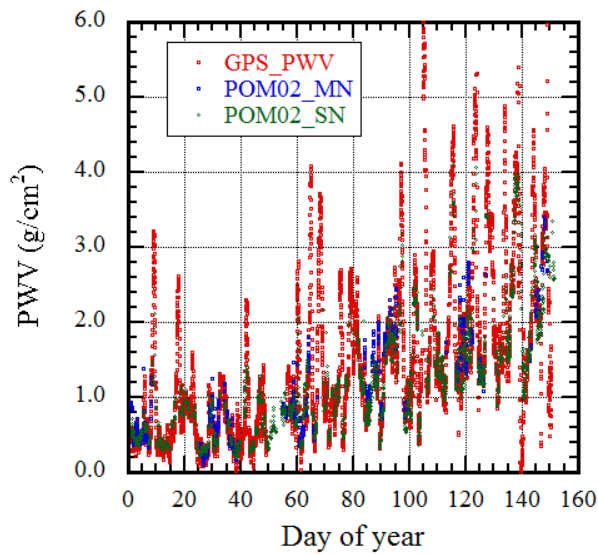

Fig. S4 Time series of the comparison between GPS and POM-02 PWV. Red symbols are GPS PWV, blue symbols are PWV in the nighttime, and green symbols are PWV in the daytime. The data are 30-minutes averages.
